# Supplementary material for: A novel method for high accuracy sumoylation site prediction from protein sequences
Source: PubMed Central journal article supplement (PMC2245905; doi:10.1186/1471-2105-9-8), 2008-01-08

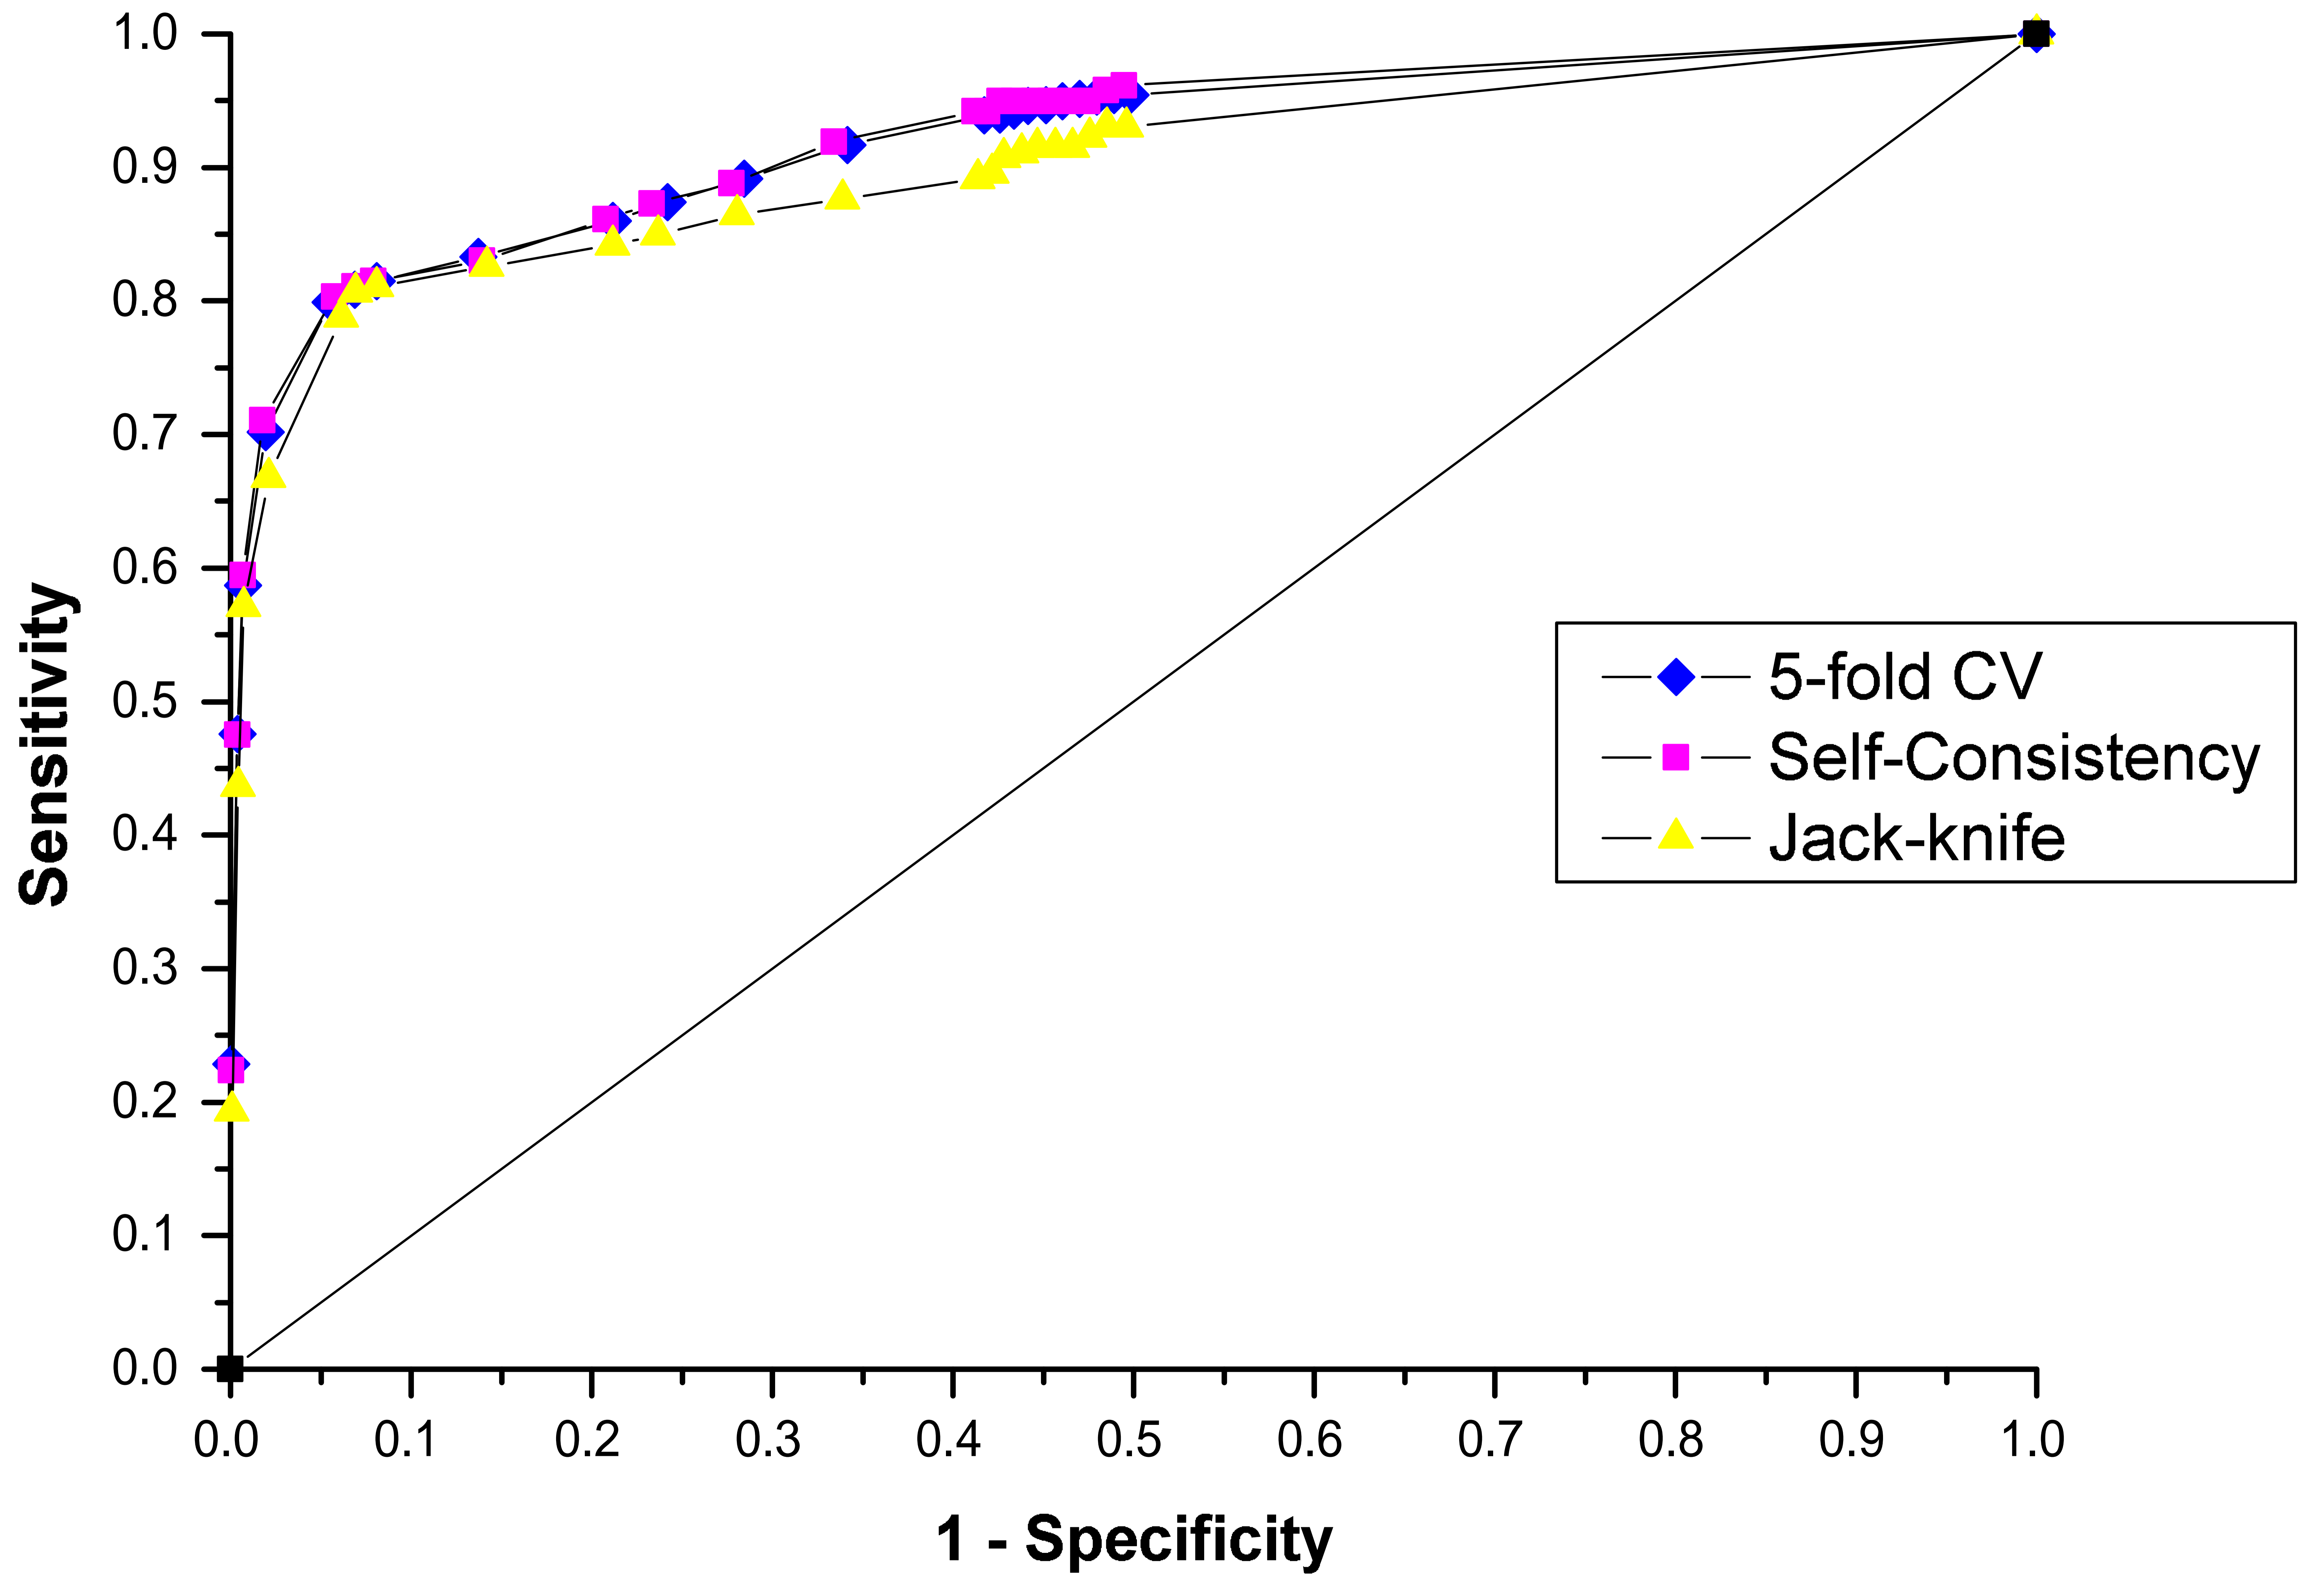

Supplement: 1471-2105-9-8-S1.pdf [file 1471-2105-9-8-S1.pdf]
