# Supplementary material for: A novel method for high accuracy sumoylation site prediction from protein sequences
Source: PubMed Central journal article supplement (PMC2245905; doi:10.1186/1471-2105-9-8), 2008-01-08
Supplement: 1471-2105-9-8-S2.pdf [file 1471-2105-9-8-S2.pdf]

## SUMOpre Training and Testing Positive Database

| Protein acc. <sup>a)</sup>                  | SUMO Pos. <sup>b)</sup> | Ref. PMID <sup>c)</sup>          | PDB acc. <sup>d)</sup> | Range <sup>e)</sup> | PDB Stru. <sup>f)</sup> |
|---------------------------------------------|-------------------------|----------------------------------|------------------------|---------------------|-------------------------|
| 144 proteins within 240 sites <sup>g)</sup> |                         |                                  |                        |                     |                         |
| Q9H3D4                                      | 588                     | 15539951                         | 1RG6                   | 540-610             | H                       |
| Q9H3D4                                      | 676                     | 15539951<br>15611636             |                        |                     |                         |
| O56136                                      | 84                      | 15527853                         |                        |                     |                         |
| O56136                                      | 447                     | 15527853                         | 1U0J                   | 225-490             | C                       |
| P19544                                      | 73                      | 15520190                         |                        |                     |                         |
| P19544                                      | 177                     | 15520190                         |                        |                     |                         |
| O75030                                      | 289                     | 15507434                         | 1AN4                   | HSSP                |                         |
| O75030                                      | 423                     | 15507434                         | 1AN4                   | HSSP                |                         |
| P19532                                      | 330                     | 15507434                         | 1AN4                   | HSSP                |                         |
| P19484                                      | 347                     | 15507434                         | 1AM9                   | HSSP                |                         |
| P37231                                      | 107                     | 15229330<br>15507114             |                        |                     |                         |
| Q02447                                      | 120                     | 12419227                         | 1SP1                   | HSSP                |                         |
| Q02447                                      | 551                     | 15247228<br>15494207             | 1SP1                   | HSSP                |                         |
| Q16665                                      | 391                     | 15465032                         |                        |                     |                         |
| Q16665                                      | 477                     | 15465032                         |                        |                     |                         |
| P46060                                      | 524                     | 15355965                         | 1Z5S                   | 418-587             | C                       |
| Q14191                                      | 496                     | 15355988                         |                        |                     |                         |
| P43694                                      | 365                     | 15337742                         | 1GNF                   | HSSP                |                         |
| Q08211                                      | 76                      | 15312759                         | 1UIL                   | 4-89                | H                       |
| Q08211                                      | 120                     | 15312759                         |                        |                     |                         |
| P36508                                      | 411                     | 15280358                         | 1SP2                   | HSSP                |                         |
| Q03188                                      | 534                     | 15272016                         |                        |                     |                         |
| Q03188                                      | 721                     | 15272016                         |                        |                     |                         |
| Q03188                                      | 746                     | 15272016                         |                        |                     |                         |
| P63279                                      | 153                     | 15272016                         | 1A3S                   | 1-158               | O                       |
| P19419                                      | 230                     | 14992729<br>15210726             |                        |                     |                         |
| P19419                                      | 249                     | 14992729<br>15210726             |                        |                     |                         |
| P19419                                      | 254                     | 15210726                         |                        |                     |                         |
| Q9Y4L2                                      | 244                     | 15208321                         | 1TF3                   | HSSP                |                         |
| Q9Y4L2                                      | 263                     | 15208321                         | 1TF3                   | HSSP                |                         |
| Q13285                                      | 119                     | 15192080<br>15192092<br>15713642 |                        |                     |                         |

|        |     |          |      |         |   |
|--------|-----|----------|------|---------|---|
|        |     | 15192080 |      |         |   |
| Q13285 | 194 | 15192092 |      |         |   |
|        |     | 15713642 |      |         |   |
| P15976 | 137 | 15173587 | 1GNF | HSSP    |   |
| P15873 | 127 | 12226657 | 1PLQ | 1-258   | N |
|        |     | 15121847 |      |         |   |
| P15873 | 164 | 12226657 | 1PLQ | 1-258   | C |
|        |     | 15121847 |      |         |   |
|        |     | 15542864 |      |         |   |
| Q05193 | 376 | 15123615 |      |         |   |
| Q60591 | 684 | 15117942 | 1A02 | HSSP    |   |
| Q60591 | 897 | 15117942 | 1A02 | HSSP    |   |
| P41212 | 99  | 12626745 | 1JI7 | 47-124  | C |
|        |     | 15107848 |      |         |   |
| O13066 | 517 | 15094046 | 1KPS | HSSP    |   |
| O60812 | 237 | 15082759 | 1WF2 | 2-92    | H |
| P42858 | 6   | 15064418 |      |         |   |
| P42858 | 9   | 15064418 |      |         |   |
| P42858 | 15  | 15064418 |      |         |   |
| Q13485 | 113 | 12621041 | 1DD1 | 285-552 | C |
|        |     | 12740389 |      |         |   |
|        |     | 15028714 |      |         |   |
| Q13485 | 159 | 12621041 | 1DD1 | 285-552 | C |
|        |     | 12740389 |      |         |   |
|        |     | 14514699 |      |         |   |
|        |     | 15028714 |      |         |   |
|        |     | 15637079 |      |         |   |
| Q03933 | 82  | 11278381 | 3HTS | HSSP    |   |
|        |     | 15023536 |      |         |   |
| P78347 | 221 | 15016812 | 1Q60 | 731-823 | H |
| P78347 | 240 | 15016812 | 1Q60 | 731-823 | H |
| P78347 | 456 | 15016812 | 1Q60 | 731-823 | H |
| P78347 | 991 | 15016812 | 1Q60 | 731-823 | H |
| Q9BYV9 | 202 | 15060166 | 1JNM | HSSP    |   |
| Q9BYV9 | 276 | 15060166 | 1JNM | HSSP    |   |
| Q9BYV9 | 421 | 15060166 | 1JNM | HSSP    |   |
| Q9BYV9 | 580 | 15060166 | 1JNM | HSSP    |   |
| O00429 | 38  | 14972687 |      |         |   |
| Q9Y6K9 | 277 | 14651848 | 1G8X | Mod     |   |
| Q9Y6K9 | 309 | 14651848 | 1G8X | Mod     |   |
| Q9UPW6 | 233 | 14701874 |      |         |   |
| Q9UPW6 | 350 | 14701874 | 1WIZ | 350-437 | H |
| P06536 | 297 | 14663148 |      |         |   |

|        |      |                                              |      |         |   |
|--------|------|----------------------------------------------|------|---------|---|
| P06536 | 313  | 14663148                                     |      |         |   |
| P25963 | 21   | 14613580<br>9069263                          | 1IKN | 67-302  | O |
| P42224 | 703  | 12855578<br>14596924<br>15761017<br>16857984 | 1YVL | 1-683   | C |
| P43354 | 91   | 14559918                                     |      |         |   |
| P43354 | 577  | 14559918                                     | 1OVL | 328-598 | C |
| Q05516 | 242  | 14527952                                     |      |         |   |
| Q9NS56 | 560  | 14516784                                     | 1CHC | HSSP    |   |
| P08235 | 89   | 14500761                                     |      |         |   |
| P08235 | 399  | 14500761                                     |      |         |   |
| P08235 | 428  | 14500761                                     |      |         |   |
| P08235 | 494  | 14500761                                     |      |         |   |
| P08235 | 953  | 14500761                                     | 1Y9R | 731-984 | C |
| Q05397 | 152  | 14500712                                     |      |         |   |
| P06401 | 388  | 12529333<br>12943706<br>12114521             |      |         |   |
| Q09472 | 1020 | 12718889<br>12887893<br>15632193             |      |         |   |
| Q09472 | 1024 | 12718889<br>12887893<br>15632193             |      |         |   |
| P17676 | 174  | 12810706                                     |      |         |   |
| P11831 | 147  | 12788062                                     | 1HBX | 132-223 | C |
| Q13363 | 428  | 12679040<br>12769861                         |      |         |   |
| P32457 | 4    | 12149243<br>12761287                         |      |         |   |
| P32457 | 11   | 12149243<br>12761287                         |      |         |   |
| P32457 | 30   | 12149243<br>12761287                         |      |         |   |
| P32457 | 63   | 12149243<br>12761287<br>15542864             |      |         |   |
| P32457 | 287  | 12761287                                     |      |         |   |
| P32457 | 443  | 12761287                                     |      |         |   |
| P32457 | 465  | 12761287                                     |      |         |   |
| Q12216 | 438  | 12761287                                     |      |         |   |

|        |      |                                  |      |         |   |
|--------|------|----------------------------------|------|---------|---|
| Q12216 | 446  | 12761287                         |      |         |   |
| Q99497 | 130  | 12761214<br>15976810             | 1J42 | 1-189   | C |
| P23769 | 222  | 12750312                         |      |         |   |
| P23769 | 389  | 12750312                         |      |         |   |
| Q924A0 | 297  | 12727872                         | 1JPW | HSSP    |   |
| Q00613 | 298  | 11514557<br>12646186<br>12665592 | 1HKT | HSSP    |   |
| P10242 | 503  | 12631292<br>16162816             | 1MBE | HSSP    |   |
| P10242 | 527  | 12631292<br>16162816             | 1MBE | HSSP    |   |
| P36956 | 123  | 12615929                         |      |         |   |
| P36956 | 418  | 12615929                         |      |         |   |
| Q12772 | 464  | 12615929                         |      |         |   |
| P16220 | 285  | 12552083                         | 1KDX | HSSP    |   |
| P16220 | 304  | 12552083                         | 1KDX | HSSP    |   |
| Q15788 | 732  | 12529333                         |      |         |   |
| Q15788 | 774  | 12529333                         |      |         |   |
| P49715 | 161  | 12511558                         | 1NWQ | HSSP    |   |
| P55854 | 11   | 12506199                         | 1WZ0 | SMR     |   |
| P56817 | 275  | 12506199                         | 1FKN | 56-446  | O |
| P11387 | 103  | 11709553                         |      |         |   |
| P11387 | 117  | 11709553<br>12439742             |      |         |   |
| P11387 | 153  | 11709553<br>12439742             |      |         |   |
| P11387 | 328  | 11709553                         | 1A31 | 175-689 | C |
| P11387 | 436  | 11709553                         | 1A31 | 175-689 | C |
| Q13547 | 444  | 11960997<br>12393750             | 1C3P | HSSP    |   |
| Q13547 | 476  | 11960997<br>12393750             | 1C3P | HSSP    |   |
| P27540 | 245  | 12354770                         |      |         |   |
| O15169 | 857  | 12223491                         |      |         |   |
| O15169 | 860  | 12223491                         |      |         |   |
| Q9NSC2 | 1086 | 12200128                         | 1SP2 | HSSP    |   |
| P10275 | 386  | 12177000                         |      |         |   |
| P10275 | 520  | 12177000                         |      |         |   |
| P49716 | 120  | 12161447                         | 1H89 | HSSP    |   |
| Q9UER7 | 630  | 12150977                         |      |         |   |
| Q9UER7 | 631  | 12150977                         |      |         |   |

|          |      |                                             |      |         |   |
|----------|------|---------------------------------------------|------|---------|---|
| P04150   | 277  | 12144530                                    |      |         |   |
| P04150   | 293  | 12144530                                    |      |         |   |
| P04150   | 703  | 12144530                                    | 1NHZ | 500-777 | N |
| P06786   | 1220 | 12086615                                    |      |         |   |
| P06786   | 1246 | 12086615                                    |      |         |   |
| P06786   | 1277 | 12086615                                    |      |         |   |
| P05549   | 10   | 12072434                                    |      |         |   |
| Q92481   | 10   | 12072434                                    |      |         |   |
| Q15596   | 239  | 12060666                                    |      |         |   |
| Q15596   | 731  | 12060666                                    |      |         |   |
| Q15596   | 788  | 12060666                                    |      |         |   |
| P56524   | 559  | 12032081<br>16166628                        |      |         |   |
| Q13569   | 330  | 11889051<br>15823533<br>15959518            | 1WYW | 112-339 | C |
| P04637   | 386  | 11867732                                    | 1DT7 | 367-388 | H |
| P05627   | 229  | 10788439<br>11867732<br>16055710            | 1FOS | HSSP    |   |
| P05627   | 257  | 16055710                                    | 1FOS | HSSP    |   |
| P46061   | 526  | 11853669<br>9442102                         | 1KPS | 420-589 | O |
| P23497   | 297  | 11792325                                    |      |         |   |
| P15330-2 | 382  | 11756545                                    | 1BVO | HSSP    |   |
| P27782   | 25   | 11731474                                    |      |         |   |
| P27782   | 267  | 11731474                                    |      |         |   |
| P29590   | 65   | 9756909<br>12149243                         | 1BOR | 49-104  | C |
| P29590   | 160  | 9756909<br>11413191<br>11704854<br>12149243 |      |         |   |
| P29590   | 487  | 9756909<br>11413191<br>11704854<br>12149243 |      |         |   |
| P29590   | 490  | 9756909<br>12149243                         |      |         |   |
| O15350   | 627  | 10961991<br>12149243                        |      |         |   |
| P32458   | 412  | 12149243                                    |      |         |   |
| Q07657   | 426  | 12149243                                    |      |         |   |

|          |      |          |      |        |   |
|----------|------|----------|------|--------|---|
| Q07657   | 437  | 12149243 |      |        |   |
|          |      | 10684265 |      |        |   |
| P19893   | 175  | 11264375 |      |        |   |
|          |      | 12149243 |      |        |   |
|          |      | 10684265 |      |        |   |
| P19893   | 180  | 11264375 |      |        |   |
|          |      | 12149243 |      |        |   |
|          |      | 11005821 |      |        |   |
| P03116   | 514  | 12149243 |      |        |   |
|          |      | 11602710 |      |        |   |
| P13202   | 450  |          |      |        |   |
| Q9SUI1   | 258  | 11581165 | 1MBK | HSSP   |   |
|          |      |          |      |        |   |
| P03243   | 104  | 11553772 |      |        |   |
| Q64127   | 724  | 11313457 | 1MM2 | HSSP   |   |
| Q64127   | 742  | 11313457 | 1MM2 | HSSP   |   |
| O00541   | 517  | 11071894 |      |        |   |
| Q6XA64   | 802  | 15105549 |      |        |   |
|          |      | 11160742 |      |        |   |
| P03206   | 12   | 16112644 |      |        |   |
|          |      | 15229220 |      |        |   |
| P03209   | 19   |          |      |        |   |
| P03209   | 213  | 15229220 |      |        |   |
| P03209   | 517  | 15229220 |      |        |   |
| P61086   | 13   | 15723079 | 1YLA | 1-199  | C |
| P45448   | 213  | 15713642 |      |        |   |
| P45448   | 289  | 15713642 |      |        |   |
| P33244-2 | 418  | 15713642 | 2NLL | HSSP   |   |
| P57682   | 10   | 15684403 | 1SP2 | HSSP   |   |
| P57682   | 198  | 15684403 | 1SP2 | HSSP   |   |
| Q15744   | 121  | 15661739 | 1H89 | HSSP   |   |
| Q16514   | 19   | 15637059 |      |        |   |
| Q15542   | 14   | 15637059 | 1ERJ | HSSP   |   |
| P04591   | 474  | 15613319 |      |        |   |
| P00445   | 18   | 15596868 | 1B4L | 1-153  | C |
| P00445   | 69   | 15596868 | 1B4L | 1-153  | O |
| P05750   | 211  | 15596868 |      |        |   |
| P16649   | 270  | 15596868 |      |        |   |
| Q07979   | 322  | 15596868 |      |        |   |
| Q07979   | 328  | 15596868 |      |        |   |
| P04456   | 60   | 15542864 | 1K5Y | 59-135 | P |
| P11978   | 1128 | 15542864 |      |        |   |
| Q04322   | 498  | 15542864 |      |        |   |
| P21538   | 807  | 15542864 | 1GVD | HSSP   |   |
|          |      | 15743823 |      |        |   |
| Q14814   | 439  | 16166628 | 1EGW | HSSP   |   |

|        |      |          |      |         |  |   |
|--------|------|----------|------|---------|--|---|
| P41970 | 162  | 15580297 | 1HBX | HSSP    |  |   |
| Q9U1H5 | 438  | 15788563 | 1GT0 | HSSP    |  |   |
| Q13422 | 58   | 15767674 | 1BBO | HSSP    |  |   |
| Q13422 | 241  | 15767674 | 1BBO | HSSP    |  |   |
| Q9H2X6 | 32   | 15766567 | 1H0V | HSSP    |  |   |
| Q9H2X6 | 1191 | 12149243 | 1H0V | HSSP    |  |   |
| P06400 | 720  | 15806172 | 1GUX | 636-787 |  | C |
| P21063 | 95   | 15800065 | 2AFP | HSSP    |  |   |
| O00180 | 274  | 15820677 |      |         |  |   |
| P54253 | 16   | 15824120 |      |         |  |   |
| P54253 | 194  | 15824120 |      |         |  |   |
| P54253 | 610  | 15824120 | 1OA8 | 563-694 |  | O |
| P54253 | 697  | 15824120 |      |         |  |   |
| P54253 | 746  | 15824120 |      |         |  |   |
| P54132 | 317  | 15829507 |      |         |  |   |
| P54132 | 331  | 15829507 |      |         |  |   |
| P54132 | 344  | 15829507 |      |         |  |   |
| P54132 | 347  | 15829507 |      |         |  |   |
| Q8N2W9 | 35   | 15831457 |      |         |  |   |
| P42575 | 77   | 15882978 |      |         |  |   |
| P41161 | 89   | 15857832 | 2STT | HSSP    |  |   |
| P41161 | 263  | 15857832 | 2STT | HSSP    |  |   |
| P41161 | 293  | 15857832 | 2STT | HSSP    |  |   |
| P41161 | 350  | 15857832 | 2STT | HSSP    |  |   |
| O60315 | 391  | 16061479 | 1A1G | HSSP    |  |   |
| O60315 | 866  | 16061479 | 1A1G | HSSP    |  |   |
| P01100 | 265  | 16055710 |      |         |  |   |
| O92597 | 158  | 16014952 |      |         |  |   |
| P14921 | 15   | 16319071 |      |         |  |   |
| Q90YL1 | 61   | 16256735 | 1GT0 | HSSP    |  |   |
| Q90YL1 | 365  | 16256735 | 1GT0 | HSSP    |  |   |
| Q8AXX8 | 52   | 16256735 | 1GT0 | HSSP    |  |   |
| Q8AXX8 | 341  | 16256735 | 1GT0 | HSSP    |  |   |
| P18412 | 54   | 16306045 |      |         |  |   |
| Q92793 | 998  | 16287980 |      |         |  |   |
| Q92793 | 1033 | 16287980 |      |         |  |   |
| Q92793 | 1056 | 16287980 |      |         |  |   |
| Q16621 | 368  | 16287851 |      |         |  |   |
| P40381 | 103  | 16168376 |      |         |  |   |
| O60016 | 109  | 16168376 |      |         |  |   |
| O60016 | 160  | 16168376 |      |         |  |   |
| O42934 | 198  | 16168376 | 1KNA | HSSP    |  |   |

|          |      |          |      |         |   |
|----------|------|----------|------|---------|---|
| Q8N4C6   | 1641 | 16154161 | 1DIP | HSSP    |   |
| Q8N4C6   | 1680 | 16154161 | 1DIP | HSSP    |   |
| Q01543   | 67   | 16148010 |      |         |   |
| Q99683   | 535  | 16142216 |      |         |   |
| Q99683   | 1083 | 16142216 |      |         |   |
| Q99683   | 1114 | 16142216 |      |         |   |
| P37231-2 | 365  | 16127449 | 1FM6 | 234-505 | C |
| P55265   | 418  | 16120648 |      |         |   |
| O00327   | 259  | 16109848 | 1AM9 | HSSP    |   |
| Q969V6   | 499  | 16098147 |      |         |   |
| Q969V6   | 576  | 16098147 |      |         |   |
| Q969V6   | 624  | 16098147 |      |         |   |

15 proteins within 28 sites <sup>h)</sup>

|          |      |          |      |           |   |
|----------|------|----------|------|-----------|---|
| Q5U0M2   | 15   | 16862185 |      |           |   |
| Q5U0M2   | 227  | 16862185 |      |           |   |
| Q86YP4   | 30   | 16738318 |      |           |   |
| Q86YP4   | 487  | 16738318 |      |           |   |
| Q5VUR2   | 33   | 16738318 |      |           |   |
| O95600   | 67   | 16617055 | 1SP2 | HSSP      |   |
| Q07666   | 96   | 16568089 |      |           |   |
| Q13426   | 210  | 16478998 | 1IK9 | 1-213     | C |
| Q06413   | 391  | 16478538 | 1EGW | HSSP      |   |
| P10636-8 | 339  | 16464864 |      |           |   |
| Q9NRA1   | 314  | 16443219 | 1NT0 | HSSP      |   |
| P49792   | 2571 | 16194093 |      |           |   |
| P49792   | 2592 | 16194093 |      |           |   |
| P49792   | 2650 | 16194093 | 1Z5S | 2631-2711 | C |
| P49792   | 2723 | 16194093 |      |           |   |
| P49792   | 2725 | 16194093 |      |           |   |
| P63165   | 16   | 16194093 | 1A5R | 1-101     | H |
| P63165   | 37   | 16194093 | 1A5R | 1-101     | H |
| P63165   | 39   | 16194093 | 1A5R | 1-101     | C |
| P63165   | 46   | 16194093 | 1A5R | 1-101     | H |
| P61956   | 5    | 16194093 | 1WZ0 | 1-93      | H |
| P61956   | 11   | 16194093 | 1A5R | 1-93      | C |
| P61956   | 42   | 16194093 | 1A5R | 1-93      | C |
| P06876   | 499  | 16162816 |      |           |   |
| P06876   | 523  | 16162816 |      |           |   |
| P12004   | 164  | 15931174 | 1AXC | 1-261     | C |
| O15151   | 254  | 15907800 |      |           |   |



- a) All protein access numbers are based on those in Uniprot KB;
- b) SUMO Pos. is the position of sumoylated sites in corresponding sequences.
- c) Ref. PMID: Corresponding reference PMID that reported the experimentally identified SUMOylated sites;
- d) PDB acc.: protein structure access number in PDB database;
- e) Range: Sequence range containing PDB structure;
- f) PDB Stru.: PDB structure in corresponding sumoylated sites;
- g) The first dataset including 144 substrate sequences (240 sites) reported before Dec. 10 2005;
- h) The second dataset including 15 substrate sequences (28 sites) reported between Dec. 10 2005 and Aug. 10 2006;
